# Supplementary material for: Boric acid-destabilized lithium borohydride with a 5.6 wt% dehydrogenation capacity at moderate temperatures
Source: Royal Society of Chemistry journal article supplement (doi:10.1039/c7dt00337d), 2017-01-01
Supplement: c7dt00337d1.pdf [file c7dt00337d1.pdf]

### Supporting Information

#### Boric Acid destabilized Lithium Borohydride with 5.6 wt% dehydrogenation capacity at moderate temperature

Yong Wu, Jun Chen, Yue Qi, Yuxuan Zhang, He Fu, Jie Zheng\* and Xingguo Li\*

*Beijing National Laboratory for Molecular Sciences (BNLMS), College of Chemistry and Molecular Engineering, Peking University, Beijing 100871, China*

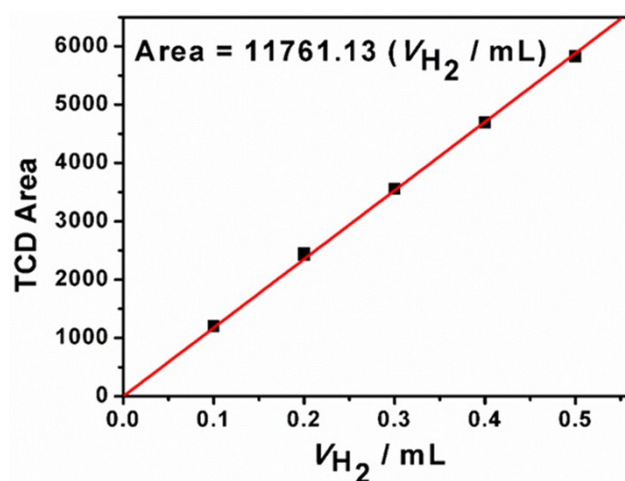

**Fig. S1.** Calibration curve for TCD measurement using  $H_2$  as the standard material.
